# Supplementary material
Source: Springer Nature journal article supplement (https://www.springermedizin.de/resource/supplementary/12955_2013_1405_MOESM1_ESM.pdf/9559090)

**Mean**

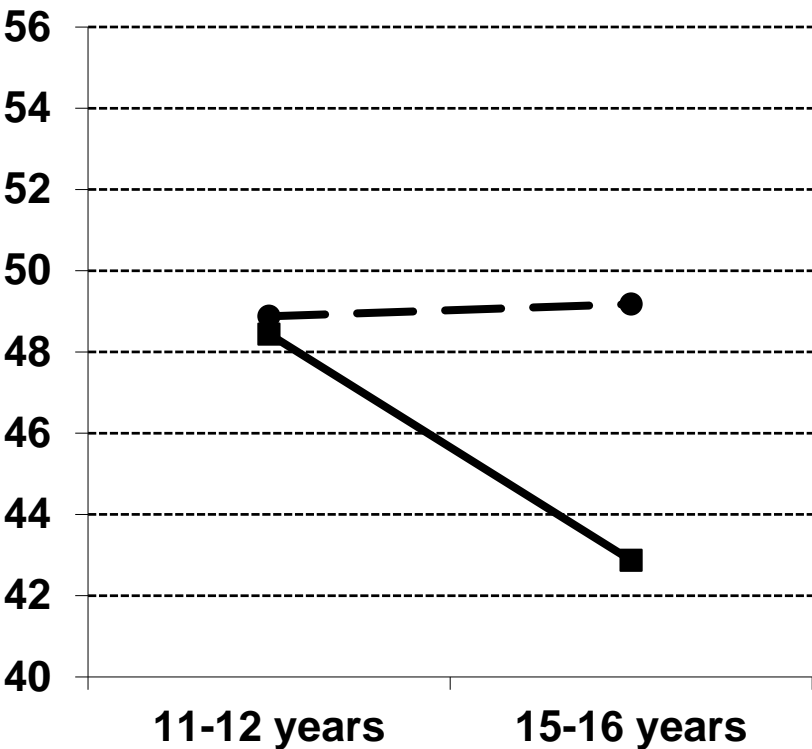

● Boys

■ Girls

Supplement: MOESM1 [file 9559090]
